# Supplementary material for: RACK1 promotes tumorigenicity of colon cancer by inducing cell autophagy
Source: PubMed Central journal article supplement (PMC6242835; doi:10.1038/s41419-018-1113-9), 2018-11-19
Supplement: 41419_2018_1113_MOESM1_ESM.pdf [file 41419_2018_1113_MOESM1_ESM.pdf]

**Supplementary Table S1. The expression level of RACK1 in the colon epithelial carcinogenic process**

| <b>Expression level</b> | <b>NCM<br/>(n, %)</b> | <b>Polyp<br/>(n, %)</b> | <b>Adenoma<br/>(n, %)</b> | <b>Adenocarcinoma<br/>(n, %)</b> | <b>LNM<br/>(n, %)</b> |
|-------------------------|-----------------------|-------------------------|---------------------------|----------------------------------|-----------------------|
| Low (0-3)               | 56(88.9)              | 40(66.7)                | 29(48.3)                  | 60(33.3)                         | 6(15.0)               |
| High (4-6)              | 79(11.1)              | 20(33.3)                | 31(51.7)                  | 120(66.7)                        | 34(85.0)              |
| Sum                     | 63                    | 60                      | 60                        | 180                              | 40                    |

NCM, normal colon mucosa; LNM, lymph node metastasis  
 $\chi^2$  test. The overall difference:  $P < 0.001$ ; NCM vs. Polyp:  $P < 0.01$ ; Polyp vs. Adenoma:  $P < 0.05$ ; Adenoma vs. Adenocarcinoma:  $P < 0.05$ ; Adenocarcinoma vs. LNM:  $P < 0.05$ .

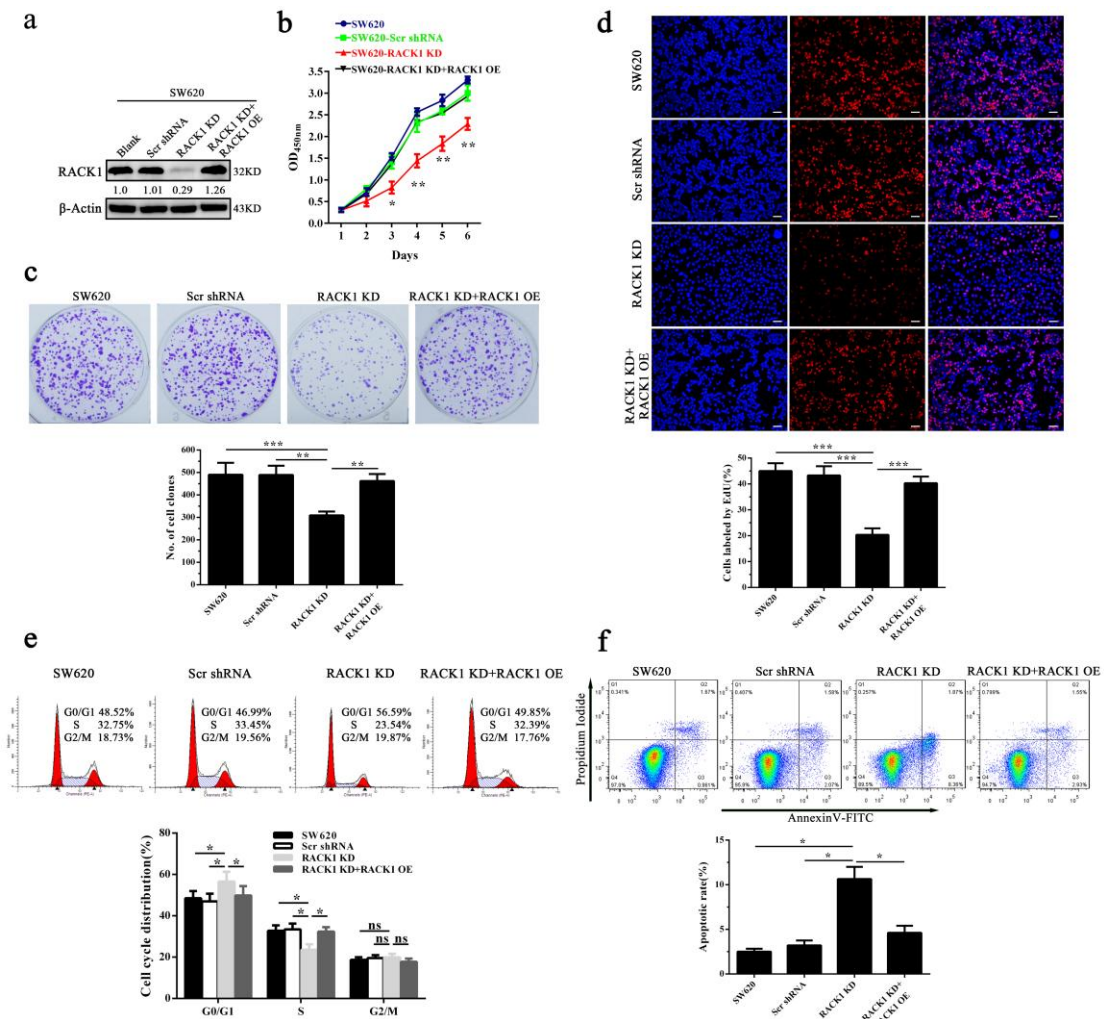

**Supplementary Figure S1. Reexpression of RACK1 rescues cell proliferation and apoptosis in the RACK1 KD SW620 cells.** (a) Western blot analysis showing the expression levels of RACK1 in the SW620-RACK1 KD cells [shRNA targeting the 3'UTR (5'-GTAAAGCTCTGCCATAAACTT-3') of human RACK1 transcript] transfected with lentiviral vector OE expressing RACK1 ORF and its control cells. Analysis of cell proliferation by CCK-8 (b), plate clone formation (c) and EdU incorporation (d) assay in the SW620-RACK1 KD cells transfected with lentiviral vector expressing RACK1 ORF and its control cells. Analysis of cell cycle distribution (e) and cell apoptosis (f) by flow cytometry in the SW620-RACK1 KD cells transfected with lentiviral vector expressing RACK1 ORF and its control cells. Three experiments were done; Means, SDs, and statistical significance are denoted; \*,  $P < 0.05$ ; \*\*,  $P < 0.01$ ; \*\*\*,  $P < 0.001$ ; ns, no significance. Scale bars = 200 $\mu$ m.

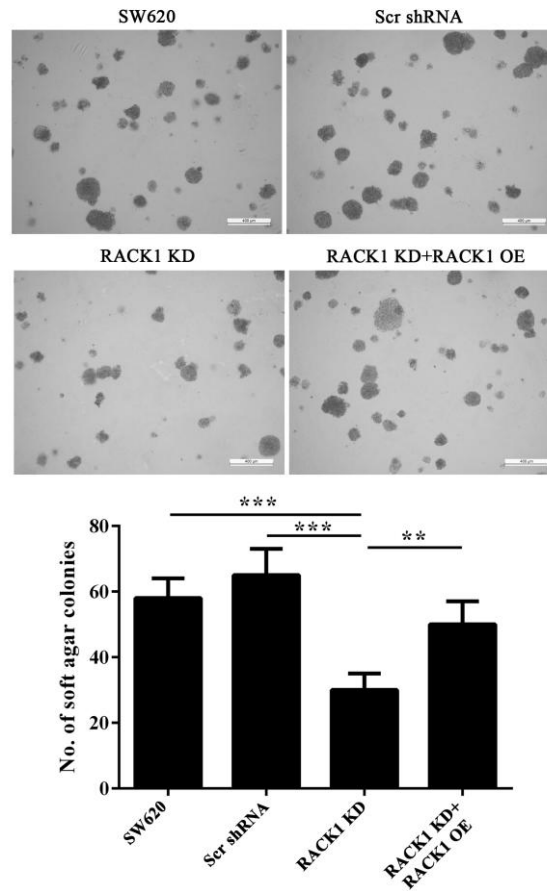

**Supplementary Figure S2. Reexpression of RACK1 rescues cell anchorage independent growth in the RACK1 KD SW620 cells.** Analysis of cell anchorage independent growth by soft agar colony formation assay in the SW620-RACK1 KD cells transfected with lentiviral vector expressing RACK1 ORF and its control cells. Three experiments were done; Means, SDs, and statistical significance are denoted; \*\*,  $P < 0.01$ ; \*\*\*,  $P < 0.001$ . Scale bars =  $400\mu\text{m}$ .

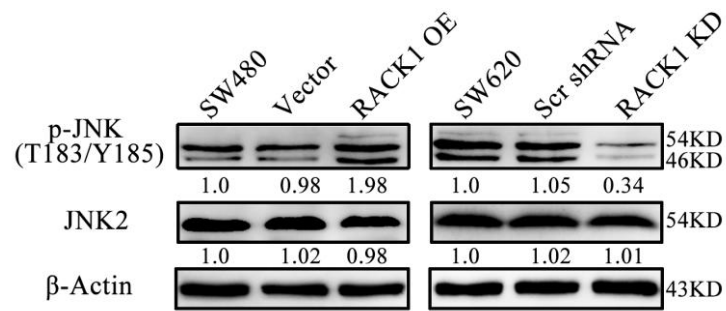

**Supplementary Figure S3. RACK1 activates JNK signaling in the colon cancer cells.** Western blot analysis showing the expression levels of phospho-JNK-1/2 and JNK-2 in the SW480-RACK1 OE cells, SW620-RACK1 KD cells and their control cells.
